# Supplementary material for: Acute sprint exercise transcriptome in human skeletal muscle
Source: PLoS One. 2019 Oct 24;14(10):e0223024. doi: 10.1371/journal.pone.0223024 (PMC6812755; doi:10.1371/journal.pone.0223024)
Supplement: S3 Table — (XLSX) [file pone.0223024.s006.xlsx]

## Sheet: Tabel S3
Table S3. Biofunctions as identified by the IPA-analysis from 879 differentially expressed genes in skeletal muscle after sprint exercise in 7 men and 7 women.
Categories	Diseases or Functions Annotation	p-Value	Predicted Activation State	Activation z-score	Molecules	# Molecules
Cellular Development, Tissue Development	differentiation of connective tissue	1.64e-10	Increased	2.303	ACVR1,ACVR2A,ADM,ADRB2,ANKRD26,ATF3,BCL2L1,CDKN1A,CEBPB,CMKLR1,CSF3,CYR61,DDIT3,DDR2,EIF2AK3,EMP1,EPHB4,ERG,FAM20C,FBXW7,FGFR1,FIGF,FOS,FOSL2,FOXO1,GADD45B,GDNF,H3F3A/H3F3B,HDAC9,HES1,HEY1,IFT80,IL33,IL6R,IRF1,IRS2,JAK2,JUN,JUNB,JUND,KIT,KLF10,KLF13,LAMA4,LPIN1,MAFB,MAFG,MAFK,MAP2K3,MAP3K14,mir-23,mir-27,MSTN,MYC,MYOD1,NOCT,NOS3,NR3C2,NR4A1,NR4A3,PDK4,PIK3R1,PKDCC,POR,PPARD,PPARGC1A,PPARGC1B,RARA…	87
Cellular Development, Tissue Development	differentiation of connective tissue cells	8.58e-10	Increased	2.682	ACVR1,ACVR2A,ADM,ADRB2,ANKRD26,ATF3,CDKN1A,CEBPB,CMKLR1,CYR61,DDIT3,DDR2,EIF2AK3,EPHB4,FAM20C,FBXW7,FGFR1,FIGF,FOS,FOSL2,FOXO1,GADD45B,GDNF,H3F3A/H3F3B,HDAC9,HES1,HEY1,IFT80,IL33,IL6R,IRS2,JUN,JUNB,JUND,KLF10,LAMA4,LPIN1,MAFB,MAFG,MAFK,MAP2K3,MAP3K14,mir-23,mir-27,MSTN,MYC,MYOD1,NOCT,NOS3,NR3C2,NR4A1,NR4A3,PDK4,PIK3R1,PKDCC,POR,PPARD,PPARGC1A,PPARGC1B,RARA,RBL1,RGS2,SMAD1,SMAD3,SMAD7,SOCS7,THRB,T…	78
Cellular Development	differentiation of cells	2.49e-09	Increased	3.533	ACVR1,ACVR2A,ADAM22,ADAMTS9,ADM,ADRB2,ALG2,ALPK3,ANGPT1,ANGPTL2,ANKRD26,AQP3,ARHGAP19,ASB2,ASPN,ATF3,ATOH8,ATP2C1,BAIAP2,BCL2L1,BHLHE40,CDKN1A,CEBPB,CISH,CMKLR1,CPEB3,CPEB4,CRK,CSF3,CYR61,DDIT3,DDIT4,DDR2,DDX58,DIAPH1,DIXDC1,DLL1,DLL4,DUSP1,DUSP10,EGR1,EGR3,EIF2AK3,EMP1,ENC1,ENG,EPHB1,EPHB4,ERG,ERRFI1,ESR1,ETS2,EYA1,FABP7,FAM20C,FBXW7,FGF6,FGFR1,FIGF,FLCN,FOS,FOSL2,FOXO1,FZD7,GAB1,GADD45B,GDNF,GE…	202
Gene Expression	transactivation	2.98e-08	Increased	2.12	ACTN4,ACVR1,ACVR2A,CEBPB,DDIT3,DDX58,DDX60L,E2F3,EGR1,EGR3,EPHB1,ERG,ESR1,ETS2,FOS,FOSB,FOSL2,FOXO1,FRK,GAB1,GADD45A,HES1,IL33,IRF1,JUN,JUNB,JUND,KIAA0922,KLF13,KLF6,MAFB,MAP2K3,MAP3K14,MED26,MEOX2,mir-27,MSTN,MYC,MYOD1,MYOG,NR3C2,NR4A1,NR4A3,PDE8A,PIK3R1,PIM1,PODXL,PPARD,PPARGC1A,PRKACB,PRMT2,PTTG1,RARA,RPL7A,SIM1,SLC19A2,SMAD3,SMAD7,SRA1,TCF4,TGIF1,THRB,TLE1,TNFRSF1B,TRIM45,UPF3B,VHL,ZBTB16	68
Cellular Movement	migration of cells	9.37e-08	Increased	2.189	ABHD2,ACTB,ACTN4,ACVR1,ADAM15,ADAMTS1,ADM,ADRB2,ANGPT1,ANGPTL2,ANGPTL4,ANXA3,AQP3,ARHGAP24,ASB2,ATF3,ATOH8,BBS4,BCAR1,BCL2L1,BHLHE40,CD58,CDKN1A,CEBPB,CMKLR1,CORO1C,CRK,CRY1,CSF3,CX3CR1,CYR61,DACH1,DAPK3,DDIT4,DDR2,DDX58,DGKD,DIAPH1,DLL4,DUSP1,DUSP10,E2F3,EGR1,ENG,EPHB1,EPHB4,ERG,ERRFI1,ESR1,FABP7,FAM65B,FAP,FBXO4,FBXW7,FGF6,FGFR1,FIGF,FLCN,FLRT2,FOS,FOXO1,FRK,FZD4,FZD7,GAB1,GADD45A,GDNF,HEY1,HSP…	171
Cellular Development, Cellular Growth and Proliferation	proliferation of blood cells	1.42e-07	Increased	2.09	ABCG1,ADRB2,B3GNT5,BCL2L1,BHLHE40,BTN3A1,CD58,CDKN1A,CEBPB,CHST3,CISH,CSF3,DIAPH1,DLL1,DLL4,DUSP1,DUSP10,EGR1,EGR3,EPHB1,ERG,ESR1,ETS2,FGFR1,FOS,FOXO1,FTL,GADD45A,GADD45B,HES1,HSPA1A/HSPA1B,HSPA8,IKZF2,IL1R1,IL33,IL6R,IRF1,IRS2,JAK2,JUN,JUNB,JUND,KDR,KIT,KLF3,LPIN1,LTBP1,MAFB,MAFG,MAP3K14,MAP3K2,mir-15,MIR17HG,MNT,MYC,MYH10,NFIL3,NPC1,NRG1,PDE4D,PIK3R1,PIM1,PIM3,RARA,RELT,RGS2,S1PR1,SH2B3,SH3GL1,…	88
Cellular Movement	cell movement	1.49e-07	Increased	2.26	ABHD2,ACTB,ACTN4,ACVR1,ADAM15,ADAMTS1,ADM,ADRB2,ANGPT1,ANGPTL2,ANGPTL4,ANXA3,AQP3,ARHGAP19,ARHGAP24,ASB2,ATF3,ATOH8,BBS4,BCAR1,BCL2L1,BHLHE40,CD58,CDKN1A,CEBPB,CMKLR1,CORO1C,CRK,CRY1,CSF3,CX3CR1,CYR61,DACH1,DAPK3,DDIT4,DDR2,DDX58,DGKD,DIAPH1,DLL1,DLL4,DUSP1,DUSP10,E2F3,EGR1,ENG,EPHB1,EPHB4,ERG,ERRFI1,ESR1,FABP7,FAM65B,FAP,FBXO4,FBXW7,FGF6,FGFR1,FIGF,FLCN,FLRT2,FOS,FOSB,FOSL2,FOXO1,FRK,FZD4,FZD7,G…	186
Organismal Survival	survival of organism	3.77e-07	Increased	3.363	ADAM15,ADM,ADRB2,AGPAT2,ANGPT1,ANGPTL2,APEX1,ARRDC4,ATP2C1,B3GNT5,BCL2L1,CDKN1A,CEBPB,CSF3,DDX58,DIXDC1,DUSP1,E2F3,EIF2AK3,ENG,ESR1,ETS2,FBXW7,FGFR1,FOS,FOXO1,FTL,GDNF,GLUL,HK2,HSPA1A/HSPA1B,IDH1,IL1R1,IL6R,IRF1,ITGB6,JUNB,KDR,KIT,KLF3,KLF6,let-7,LFNG,LPL,LRRN1,MAGI1,MEOX2,mir-15,MIR17HG,MSTN,MYC,MYOG,NFIL3,NOS3,NPC1,NR4A3,NRG1,PARG,PHC2,PIM1,PPARD,PPARGC1B,PPP1R15A,RARA,RBL1,RHEB,SLFN11,SMAD3,TG…	76
Cellular Movement	invasion of cells	6.94e-07	Increased	2.155	ADAM15,ADAMTS1,ADM,ADRB2,AGO2,ANGPTL4,APEX1,ARHGAP24,ATF3,BCAR1,BCL2L1,BHLHE40,BMP5,CDKN1A,CEBPB,CRK,CSF3,CYR61,DDX58,DIAPH1,DIXDC1,EGR1,ENG,EPHB4,ERG,ESR1,ETS2,FAM43A,FAP,FGFR1,FIGF,FOS,FOXO1,FRK,GAB1,GBP1,GDNF,GEM,GNAL,IER3,IL33,INSIG2,IRS2,ITGB6,JAK2,JMY,JUN,JUNB,JUND,KDR,KLF6,let-7,MAGI1,mir-1,mir-23,mir-27,MIR17HG,MYC,MYH10,NEDD9,NR4A1,NRG1,PDGFA,PIK3R1,PODXL,PPARD,PTTG1,RAB11FIP1,RASA1,RHOB…	88
Cellular Growth and Proliferation	expansion of cells	1.3e-06	Increased	2.427	ANGPT1,BCAR1,BCL2L1,CDKN1A,CEBPB,CMKLR1,CSF3,DLL1,DLL4,EGR1,ERG,FGFR1,HSPA8,IL33,IL6R,IRF1,JAK2,KDR,KIT,MAOA,mir-15,MIR17HG,MNT,MYC,PIM1,PMP22,RARA,RBL1,RPGRIP1L,S1PR1,SH2B3,TNFRSF12A,TNFRSF1A,TNFRSF1B,TYR,VEGFA,VHL,ZBTB16	38
Cellular Development, Cellular Growth and Proliferation, Hematological System Development and Function	proliferation of immune cells	1.68e-06	Increased	2.012	ABCG1,ADRB2,B3GNT5,BCL2L1,BHLHE40,BTN3A1,CD58,CDKN1A,CEBPB,CHST3,CISH,CSF3,DIAPH1,DLL4,DUSP1,DUSP10,EGR1,EGR3,EPHB1,ESR1,ETS2,FOS,FOXO1,FTL,GADD45A,GADD45B,HES1,HSPA1A/HSPA1B,HSPA8,IKZF2,IL1R1,IL33,IL6R,IRF1,IRS2,JAK2,JUN,JUNB,JUND,KDR,KIT,KLF3,LPIN1,LTBP1,MAFB,MAP3K14,MAP3K2,mir-15,MIR17HG,MNT,MYC,NFIL3,NPC1,NRG1,PDE4D,PIK3R1,PIM1,PIM3,RARA,RELT,RGS2,S1PR1,SH2B3,SLC3A2,SMAD3,SMAD7,SOS1,ST3GAL5,S…	80
Cellular Development, Cellular Growth and Proliferation, Hematological System Development and Function, Hematopoiesis, Tissue Development	development of blood cells	9.15e-06	Increased	2.332	ABCG1,ADM,AGO2,ANGPT1,ANGPTL4,BCL2L1,BHLHE40,CDKN1A,CEBPB,CISH,CSF3,CYR61,DLL1,DLL4,DUSP10,EGR1,EGR3,ERG,ETS2,FLCN,FOS,FOXO1,FZD7,GADD45B,HES1,IL17RA,IL1R1,IL33,IL6R,IRF1,JAK2,JUN,JUNB,KDR,KIT,KLF10,KLF3,let-7,LFNG,LTBP1,MAFB,MAFG,MAP3K14,mir-23,MIR17HG,MKNK2,MNT,NFIL3,NR4A1,PIK3R1,PIM1,RARA,RBL1,S1PR1,SGPL1,SH2B3,SLC11A2,SLC3A2,SMAD3,SMAD7,ST3GAL5,TCF4,TEK,TESPA1,TNFRSF1A,TNFRSF1B,TP63,USP18,VEG…	71
Organ Morphology, Skeletal and Muscular System Development and Function, Tissue Morphology	quantity of muscle cells	9.31e-06	Increased	2.261	CDKN1A,ENG,FGF6,FOXO1,HEY1,HEYL,JUN,mir-1,MSTN,MYOD1,MYOG,NR4A1,PPARGC1A,S1PR1,SMAD3,THBD,TIMP3,VEGFA	18
Cancer, Organismal Injury and Abnormalities, Respiratory Disease	pulmonary metastasis	1.1e-05	Increased	2.172	ADAMTS1,ADM,ANGPTL4,ATF3,CYR61,FGFR1,IL33,KDR,KIT,let-7,MAGI1,mir-23,mir-27,MYC,THBD,THRB,TP63	17
Tissue Development	development of connective tissue	1.32e-05	Increased	2.077	ADAMTS1,ADM,AGO2,ALG2,BCAR1,CDKN1A,CHST3,CSF3,CYR61,DLL4,EGR1,EIF2AK3,FOS,FOXO1,GNPDA1,HES1,HEY1,IL33,IL6R,IRF1,JUN,JUND,KIT,LPIN1,MAFG,MKKS,MYC,MYOD1,NR4A1,PDGFA,PPARD,PPARGC1A,RARA,RPGRIP1L,SLC11A2,SMAD1,SMAD3,SMAD7,SOS1,TBX3,TNFRSF1A,TNFRSF1B,VEGFA,WNT9A,ZBTB16	45
Skeletal and Muscular System Development and Function	quantity of muscle	1.34e-05	Increased	2.427	CDKN1A,EGR3,ENG,FGF6,FOXO1,HEY1,HEYL,JUN,mir-1,MSTN,MYOD1,MYOG,NR4A1,PPARGC1A,S1PR1,SMAD3,THBD,TIMP3,VEGFA	19
DNA Replication, Recombination, and Repair	synthesis of DNA	1.66e-05	Increased	2.352	ADM,ATF3,BCAR1,BCL2L1,C1QTNF9,CDKN1A,CRK,CSF3,CYR61,DACH1,DUSP1,E2F3,ERRFI1,ESR1,FGFR1,FOS,FOXO1,GAB1,GDNF,HSPA1A/HSPA1B,HSPA8,IRF1,IRS2,JUN,KDR,mir-23,MMS22L,MRE11A,MYC,NR4A1,NR4A3,NRG1,PDGFA,PIK3IP1,PIK3R1,PIM1,RBL1,RRAD,SDC4,SGK1,SMAD7,TNFRSF1A,TP63,VEGFA	44
Cell Death and Survival, Hematological System Development and Function	survival of hematopoietic cells	2.12e-05	Increased	2.274	BCL2L1,CSF3,EGR3,ERG,FGFR1,FOXO1,GADD45A,GADD45B,HLF,JAK2,KDR,KIT,MIR17HG,NFIL3,PIM1,VEGFA	16
Cell Death and Survival	cell survival	3.14e-05	Increased	4.181	ACVR2A,ADAMTS1,AGO2,ANGPT1,APEX1,AQP3,ATF3,BCAR1,BCL2L1,BHLHE40,BMP5,C1QTNF9,CDCA7L,CDKN1A,CEBPB,CERK,CISH,CSF3,CYR61,DDIT3,DUSP1,DUSP10,E2F3,EGR1,EGR3,EIF2AK3,EIF4A1,EMP1,ENG,EPHB4,ERCC4,ERG,ESR1,ETS2,FGF6,FGFR1,FKBP5,FN3K,FOS,FOXO1,GAB1,GADD45A,GADD45B,GDNF,H6PD,HES1,HK2,HLF,HSPA1A/HSPA1B,IDH1,IER3,IKZF2,IL33,IL6R,IP6K3,IRS2,JAK2,JUN,JUND,KDR,KIT,KLF6,LATS2,MAP3K14,mir-124,mir-15,MIR17HG,MMS22L…	120
Embryonic Development, Lymphoid Tissue Structure and Development, Organ Development, Organismal Development	development of lymphatic system component	3.82e-05	Increased	2.022	ADM,AGO2,ANGPT1,ANGPTL2,B3GNT5,BHLHE40,CDKN1A,CSF3,DIAPH1,DLL1,DLL4,EGR1,EGR3,EYA1,FGFR1,FIGF,FOSB,FZD7,HES1,IRF1,KDR,KIT,LFNG,MAFB,MAP3K14,mir-1,NFIL3,PIM1,RARA,SAMD9L,SH2B3,TNFRSF1A,TNFRSF1B,TYR,VEGFA,ZBTB16	36
Cellular Development, Hematological System Development and Function	differentiation of blood cells	4.97e-05	Increased	2.13	ACVR2A,ANGPT1,BAIAP2,BCL2L1,BHLHE40,CDKN1A,CEBPB,CISH,CSF3,CYR61,DDX58,DLL1,DLL4,EGR1,EGR3,EMP1,EPHB4,ERG,ESR1,ETS2,FLCN,FOS,FOXO1,FZD7,GADD45B,HDAC9,HERC6,IL17RA,IL1R1,IL33,IL6R,IRF1,JAK2,JUN,JUNB,KDR,KIT,KLF10,KLF13,KLF3,let-7,LFNG,LTBP1,MAFB,MAFG,MAFK,MAP3K14,mir-23,MIR17HG,MKNK2,MYC,MYOD1,NFIL3,NR4A1,PIK3R1,PPP1R15A,RARA,RASA1,RRS1,S1PR1,SAMD9L,SGPL1,SH2B3,SLC3A2,SMAD3,SMAD7,ST3GAL5,TCF4,TEK,…	77
Organismal Development	size of body	5.06e-05	Increased	3.269	ADAM22,ADAMTS1,ADRB2,ANGPTL2,ANGPTL4,ANKRD26,BBS4,CDKN1A,CERK,DDR2,DUSP1,E2F3,EIF2AK3,ESR1,FAM20C,FAT4,FBXL20,FOS,FOSB,GNAL,GTF2IRD1,H6PD,HES1,HEY1,HEYL,HK2,IFRD1,IKZF2,IL1R1,IRS2,ITPR3,KLF6,KMT5B,KRT6B,LAMA4,LFNG,LRIG2,MEOX1,MEOX2,MKKS,MNT,MSTN,MYC,MYH10,MYOD1,NOS3,NRN1,PDE10A,PDGFA,PIK3R1,PIM1,PIM3,PKDCC,PLCB4,POLR2A,PPARD,PPARGC1A,PPARGC1B,PTTG1,RBL1,SGPL1,SH3GL1,SIM1,SLC12A2,SLC25A25,SLC39A14…	79
Cell Cycle, Skeletal and Muscular System Development and Function	cell cycle progression of muscle cells	7.19e-05	Increased	2.385	E2F3,FGFR1,KIT,mir-1,MYOD1,NR4A3,PIM1,TNFRSF12A	8
Connective Tissue Development and Function, Tissue Morphology	quantity of adipose tissue	9.53e-05	Increased	2.059	ADAMTS1,ADRB2,AGPAT2,ANGPTL2,ANGPTL4,BBS4,CDKN1A,CEBPB,DUSP1,E2F3,ESR1,GTF2IRD1,IL1R1,IRS2,KLF3,LPL,MEOX1,MEOX2,MSTN,MYC,MYOG,NOS3,PPARD,PPARGC1A,PPARGC1B,RBL1,SIM1,SLC12A2,SLC25A25,TRIM63,UCP3	31
Energy Production, Lipid Metabolism, Small Molecule Biochemistry	oxidation of palmitic acid	0.000114	Increased	2.055	CPT1A,LPIN1,MYC,NR4A3,NT5C2,PPARD,PPARGC1A,PPARGC1B,SLC22A5	9
Cell Death and Survival	cell viability	0.000136	Increased	3.73	ACVR2A,ADAMTS1,AGO2,ANGPT1,APEX1,AQP3,ATF3,BCAR1,BCL2L1,BHLHE40,BMP5,C1QTNF9,CDKN1A,CEBPB,CERK,CISH,CSF3,CYR61,DDIT3,DUSP1,DUSP10,E2F3,EGR1,EGR3,EIF2AK3,EIF4A1,ENG,EPHB4,ERG,ESR1,ETS2,FGFR1,FKBP5,FN3K,FOS,FOXO1,GAB1,GADD45A,GADD45B,GDNF,H6PD,HES1,HK2,HLF,HSPA1A/HSPA1B,IDH1,IER3,IKZF2,IL33,IL6R,IP6K3,IRS2,JAK2,JUN,KDR,KIT,KLF6,LATS2,MAP3K14,mir-124,mir-15,MIR17HG,MMS22L,MNT,MRE11A,MYC,MYOD1,NFIL3,…	110
Cardiovascular System Development and Function, Organismal Development	development of aorta	0.000138	Increased	2	ACVR1,JUN,JUNB,LTBP1,MYH10,PDE2A,SEMA3C,VEGFA,WLS	9
Cellular Function and Maintenance	cellular homeostasis	0.000167	Increased	4.217	ABCG1,ADAMTS1,ADM,ADRB2,AGPAT2,ANGPT1,ANGPTL4,ANKRD26,AQP3,ATP1B3,ATP2C1,BAIAP2,BCL2L1,BCO2,BHLHE40,C1QTNF3,CDKN1A,CEBPB,CHST3,CISH,CPEB3,CRY1,CYR61,DAPK3,DDIT3,DDIT4,DLL1,DLL4,DNAJB1,EGR1,EGR3,EIF2AK3,ENG,ESR1,ETS2,FBXL20,FBXO4,FGF6,FLCN,FOS,FOXO1,FTL,FZD7,GAB1,GABARAPL1,GADD45B,GDNF,HSPA8,IL17RA,IL1R1,IL33,IL6R,IRF1,IRS2,ITPR3,JAK2,JUN,JUNB,KCNJ2,KDM4A,KDR,KIT,KLF10,let-7,LFNG,LTBP1,LXN,MAFB,MA…	132
Cellular Development, Embryonic Development, Organismal Development	differentiation of embryonic stem cells	0.000231	Increased	2.338	ANGPT1,BAIAP2,BCL2L1,CDKN1A,CSF3,ENG,EPHB4,FLCN,JUN,mir-1,MYC,MYOD1,PIM1,RBL1,VEGFA	15
Cellular Development	differentiation of stem cells	0.000263	Increased	2.237	ACVR1,ANGPT1,BAIAP2,BCL2L1,CDKN1A,CSF3,ENG,EPHB4,FBXW7,FLCN,GDNF,HES1,HEYL,IL6R,JUN,KDR,KIT,mir-1,MYC,MYOD1,NRG1,PIM1,PPARD,RBL1,S1PR1,SMAD3,VEGFA,VHL	28
Cellular Development, Cellular Growth and Proliferation, Hematological System Development and Function, Hematopoiesis, Lymphoid Tissue Structure and Development, Tissue Development	development of leukocytes	0.000269	Increased	2.62	ABCG1,ADM,ANGPTL4,BCL2L1,BHLHE40,CDKN1A,CEBPB,CISH,CSF3,CYR61,DLL1,DLL4,DUSP10,EGR1,EGR3,ETS2,FOS,FOXO1,FZD7,GADD45B,IL17RA,IL1R1,IL33,IL6R,IRF1,JAK2,JUN,JUNB,KDR,KIT,KLF10,KLF3,let-7,LFNG,LTBP1,MAFB,MAP3K14,MIR17HG,MNT,NFIL3,NR4A1,PIK3R1,PIM1,RARA,RBL1,S1PR1,SLC3A2,SMAD3,SMAD7,ST3GAL5,TCF4,TESPA1,TNFRSF1A,TNFRSF1B,TP63,USP18,VEGFA,ZBTB16,ZFP36L1	59
Cellular Development	differentiation of lymphatic system cells	0.00029	Increased	2.781	BAIAP2,BCL2L1,CDKN1A,CSF3,DLL4,EGR1,ESR1,FGFR1,GDNF,IL33,IL6R,JAK2,KIT,LFNG,MAFB,MAFG,MAFK,MAP2K3,RARA,VEGFA,VHL	21
Embryonic Development, Lymphoid Tissue Structure and Development, Organ Development, Organismal Development, Tissue Development	formation of lymphoid organ	0.00029	Increased	2.169	ADM,AGO2,B3GNT5,BHLHE40,CDKN1A,CSF3,DIAPH1,DLL1,EGR1,EGR3,EYA1,FOSB,FZD7,HES1,IRF1,KIT,LFNG,MAFB,MAP3K14,NFIL3,PIM1,RARA,SAMD9L,SH2B3,TNFRSF1A,TNFRSF1B,TYR,VEGFA,ZBTB16	29
Cellular Movement	invasion of tumor cell lines	0.000305	Increased	2.166	ADAM15,ADAMTS1,ADM,ADRB2,AGO2,ANGPTL4,APEX1,ARHGAP24,ATF3,BCAR1,BCL2L1,CDKN1A,CEBPB,CRK,CSF3,CYR61,DDX58,DIAPH1,DIXDC1,EGR1,EPHB4,ERG,ESR1,ETS2,FAM43A,FAP,FGFR1,FIGF,GBP1,GDNF,GNAL,INSIG2,IRS2,ITGB6,JUN,JUNB,JUND,KLF6,let-7,MAGI1,mir-1,mir-23,mir-27,MYC,NRG1,PDGFA,PODXL,PTTG1,RAB11FIP1,RASA1,RND3,SDC4,SLC12A2,SMAD3,SMAD7,TIMP3,TP53INP2,TP63,USP2,VEGFA,VHL	61
Energy Production, Lipid Metabolism, Small Molecule Biochemistry	oxidation of fatty acid	0.000335	Increased	2.352	ADH1C,CPT1A,FOXO1,IRS2,LPIN1,LPL,MYC,NR4A1,NR4A3,NT5C2,PDK4,POR,PPARD,PPARGC1A,PPARGC1B,PRKAG2,SLC22A5,THRB,TP63,UCP3	20
Cardiovascular System Development and Function, Organ Development, Organ Morphology, Skeletal and Muscular System Development and Function	contractility of cardiac muscle	0.000461	Increased	2.246	ADM,ADRB2,BCAR1,GAB1,IER3,LAMA4,mir-1,NOS3,NRG1,PFKFB1,PPARGC1A,RRAD,SMAD7,TIMP3,TRIM63,VEGFA,XIRP1	17
Energy Production, Lipid Metabolism, Small Molecule Biochemistry	oxidation of long chain fatty acid	0.000462	Increased	2.27	CPT1A,LPIN1,MYC,NR4A3,NT5C2,PPARD,PPARGC1A,PPARGC1B,SLC22A5,UCP3	10
Cellular Development, Cellular Growth and Proliferation	expansion of blood cells	0.000521	Increased	2.05	BCL2L1,CSF3,DLL1,DLL4,EGR1,ERG,FGFR1,HSPA8,IL33,IL6R,IRF1,JAK2,mir-15,MIR17HG,MNT,MYC,PIM1,RARA,S1PR1,SH2B3,TNFRSF1A,TNFRSF1B,TYR,VEGFA,ZBTB16	25
Cellular Development, Hematopoiesis, Tissue Development	differentiation of bone marrow cells	0.000629	Increased	3.246	BAIAP2,BCL2L1,CDKN1A,CSF3,DLL4,ESR1,FGFR1,GDNF,IL33,IL6R,JAK2,KIT,LFNG,MAFB,MAFG,MAFK,MAP2K3,RARA,VEGFA	19
Cardiovascular System Development and Function, Organ Development, Skeletal and Muscular System Development and Function	function of cardiac muscle	0.000703	Increased	2.246	ADM,ADRB2,BCAR1,GAB1,IER3,LAMA4,MAOA,mir-1,MYH10,NOS3,NRG1,PFKFB1,PPARGC1A,RHEB,RRAD,SMAD7,TIMP3,TRIM63,VEGFA,XIRP1	20
Organ Morphology, Skeletal and Muscular System Development and Function	quantity of skeletal muscle	0.000733	Increased	2.207	EGR3,FGF6,HEY1,HEYL,MSTN,MYOD1,VEGFA	7
Lymphoid Tissue Structure and Development	expansion of lymphatic system component	0.000747	Increased	2.138	CSF3,IL33,mir-15,MIR17HG,PIM1,RBL1,VEGFA,ZBTB16	8
Cellular Development, Hematological System Development and Function, Hematopoiesis	differentiation of mononuclear leukocytes	0.000772	Increased	2.954	BHLHE40,CEBPB,CISH,CSF3,CYR61,DDX58,DLL1,DLL4,EGR1,EGR3,ESR1,ETS2,FOS,FOXO1,FZD7,GADD45B,HDAC9,IL17RA,IL1R1,IL6R,IRF1,JUN,JUNB,KIT,KLF10,KLF3,let-7,LFNG,LTBP1,MAFB,MIR17HG,MYC,MYOD1,NFIL3,NR4A1,PIK3R1,RARA,RASA1,S1PR1,SH2B3,SLC3A2,SMAD3,SMAD7,ST3GAL5,TCF4,TESPA1,USP18,VEGFA,ZBTB16,ZFP36L1	50
Lipid Metabolism, Small Molecule Biochemistry	synthesis of lipid	0.000805	Increased	2.284	ABCG1,ADH1C,ADM,ADRB2,AGPAT2,ALG2,ANGPT1,ATF3,B3GALT1,B3GNT5,BCL2L1,BMP5,C1QTNF3,CEBPB,CERK,CRY1,CYP2R1,DGKD,DIAPH1,EGR1,EIF2AK3,ESR1,FOS,FOXO1,GPAT3,HSPA8,IDI1,IL33,INSIG2,JAK2,KDR,KIT,LPIN1,LPL,MAP3K14,mir-27,MRE11A,MSTN,MYC,NPC1,NR4A1,NR4A3,NRG1,PDE8A,PDGFA,PDK4,PIK3C2B,PIK3R1,POR,PPARD,PPARGC1A,PRKAG2,RGS2,S1PR1,SGPL1,SLC9A3R2,SMAD3,SPTSSA,ST3GAL5,TNFRSF12A,TNFRSF1A,TNFRSF1B,VEGFA	63
Cellular Development, Cellular Growth and Proliferation, Hematological System Development and Function, Hematopoiesis, Lymphoid Tissue Structure and Development, Tissue Development	development of mononuclear leukocytes	0.000885	Increased	2.659	ABCG1,ADM,BCL2L1,BHLHE40,CDKN1A,CEBPB,CISH,CYR61,DLL1,DLL4,EGR1,EGR3,ETS2,FOS,FOXO1,FZD7,GADD45B,IL17RA,IL1R1,IL6R,IRF1,JUN,JUNB,KDR,KIT,KLF10,KLF3,let-7,LFNG,LTBP1,MAFB,MAP3K14,MIR17HG,MNT,NFIL3,NR4A1,PIK3R1,PIM1,RBL1,S1PR1,SLC3A2,SMAD3,SMAD7,ST3GAL5,TCF4,TESPA1,TNFRSF1A,TNFRSF1B,TP63,USP18,VEGFA,ZBTB16,ZFP36L1	53
Gene Expression	binding of estrogen response element	0.000931	Increased	2.149	ESR1,FOS,JUN,mir-27,NRG1,PPARGC1A	6
Cell Death and Survival	cell viability of tumor cell lines	0.000945	Increased	3.218	ACVR2A,ADAMTS1,AGO2,APEX1,AQP3,ATF3,BCL2L1,BHLHE40,BMP5,CDKN1A,CEBPB,CERK,DUSP1,DUSP10,EIF2AK3,EIF4A1,ENG,EPHB4,FGFR1,FKBP5,FN3K,GAB1,H6PD,HES1,HK2,IDH1,IER3,IL6R,IP6K3,IRS2,JUN,KDR,KIT,KLF6,LATS2,MAP3K14,mir-124,mir-15,MIR17HG,MMS22L,MYC,NR4A1,NRG1,PARG,PDP1,PHLPP2,PIK3R1,PIM1,PLEKHG2,PPARGC1A,PPFIA4,PPP2R1B,PRKACB,RARA,RASA1,RHEB,RHOJ,SGK1,SLC28A1,SLFN11,SMAD3,THBD,TNFRSF1A,TNFRSF1B,TP63,USP36,…	69
Cardiovascular System Development and Function, Organ Morphology	contractility of heart	0.000998	Increased	2.118	ADH1C,ADM,ADRB2,BCAR1,GAB1,IER3,JUND,LAMA4,mir-1,NOS3,NRG1,PFKFB1,PPARGC1A,RRAD,SMAD7,TIMP3,TRIM63,VEGFA,XIRP1	19
Cell Cycle	senescence of cells	3.43e-06	Decreased	-2.086	ARHGAP18,BCL2L1,BHLHE40,CDKN1A,CEBPB,DUSP1,E2F3,EGR1,ERG,ESR1,GADD45A,HSPA1A/HSPA1B,JUNB,JUND,KMT5B,let-7,MAP2K3,mir-15,MYC,PHC2,PPARD,PTTG1,RARA,RBL1,RHEB,RRAD,SMAD7,TBX3,THRB,TP63,VEGFA,VHL	32
Developmental Disorder, Organismal Injury and Abnormalities, Renal and Urological Disease	hypertrophy of renal glomerulus	0.000317	Decreased	-2.158	CEBPB,ESR1,FOXO1,GDNF,NOS3,RARA,SMAD7,VEGFA	8
Inflammatory Response, Organismal Injury and Abnormalities, Renal and Urological Disease	inflammation of urinary tract	0.000369	Decreased	-2.183	ACTN4,CDKN1A,CEBPB,CX3CR1,DDIT3,ESR1,GADD45A,GADD45B,GDNF,IRF1,JUN,KDR,let-7,mir-124,mir-15,mir-23,MYH10,NOS3,NR3C2,PIM1,PTTG1,SMAD3,SMAD7,TCF4,TNFRSF1A,TP63,VEGFA	27
Cardiovascular Disease, Hematological Disease	Thrombosis	0.000115	Decreased	-2.191	ABCA5,ADRB2,ANGPT1,BCL2L1,CX3CR1,E2F3,GPX3,JAK2,KDR,LPL,mir-1,NNMT,NOS3,NR3C2,PDE10A,PDGFA,PPARD,THBD,TNFRSF1A,TNFRSF1B,TRIM63,VEGFA	22
Cancer, Organismal Injury and Abnormalities, Renal and Urological Disease	hyperplasia of mesangial cells	0.00102	Decreased	-2.219	CDKN1A,CEBPB,GADD45A,GDNF,NOS3	5
Cell Death and Survival	cell death of breast cancer cell lines	6.05e-05	Decreased	-2.328	ADM,BACH1,BCAR1,BCAS2,BCL2L1,BHLHE40,CDKN1A,CEBPB,CYR61,DDIT4,DUSP1,ESR1,ETS2,FGFR1,GADD45A,HDAC9,HK2,HSPA1A/HSPA1B,IER3,IRF1,IRF2BP2,JUN,KPNA2,MAP2K3,mir-15,NEDD9,NFIL3,NOS3,NRG1,OSGIN1,PDE4D,PTTG1,RASA1,SGK1,TNFRSF1A,TP63,VEGFA	37
Inflammatory Response	inflammation of body cavity	0.000574	Decreased	-2.349	ACTB,ACTN4,ADM,AGO2,ANGPT1,ANXA3,ATF3,BCL2L1,CDKN1A,CEBPB,CISH,CMKLR1,CX3CR1,CYR61,DDIT3,DDR2,DDX58,DUSP1,E2F3,EGR1,ESR1,FGFR1,GADD45A,GADD45B,GDNF,IL17RA,IL1R1,IL33,IL6R,IRF1,ITGB6,JAK2,JUN,JUNB,KDR,KIT,let-7,LPIN1,MAP2K3,MAP3K14,mir-1,mir-124,mir-15,mir-23,mir-27,MNT,MYH10,NFIL3,NOS3,NPC1,NR3C2,PDE4D,PDE7A,PDE8A,PIK3R1,PIM1,POR,PPARD,S1PR1,SMAD3,SMAD7,STARD7,TCF4,TIMP3,TNFRSF1A,TNFRSF1B,TP53INP…	70
Inflammatory Disease, Inflammatory Response, Organismal Injury and Abnormalities, Renal and Urological Disease	Nephritis	0.000545	Decreased	-2.429	ACTN4,CDKN1A,CEBPB,CX3CR1,DDIT3,ESR1,GADD45A,GADD45B,GDNF,IRF1,JUN,KDR,let-7,mir-124,mir-15,mir-23,MYH10,NOS3,NR3C2,PIM1,SMAD3,SMAD7,TCF4,TNFRSF1A,TP63,VEGFA	26
Cardiovascular Disease	Hypertension	0.000777	Decreased	-2.559	ADH1A,ADM,ADRB2,ANGPT1,ANGPTL2,ANKRD29,APBB3,ASPN,ATP2C1,BCL2L1,CFAP69,CLCN6,DBP,DDR2,DHX35,EIF2AK3,ENG,ESR1,FAT4,FAXDC2,FMO2,FZD4,GAB1,HES1,IRS2,KDR,KIT,LMOD1,LONRF3,LPL,MAOA,mir-15,MYO10,NAALAD2,NOS3,NR3C2,PDE10A,PDE4D,PDE7A,PDE8A,PLEKHG1,PMP22,POPDC2,PPARD,PRKAG2,RFTN2,RGS2,RHOJ,RSPO3,SLC12A2,SLC16A10,SLC16A12,SMAD1,TAOK2,THBD,TMEM140,VEGFA,ZBTB16,ZBTB41	59
Developmental Disorder	Growth Failure	0.000186	Decreased	-3.718	ACTN4,AGO2,APEX1,ATP2C1,BCAR1,CDKN1A,DDR2,DIAPH1,DLL4,E2F3,EGR1,EIF2AK3,FAM20C,FBXW7,FGFR1,FLRT3,FOSL2,GADD45A,H3F3A/H3F3B,HK2,ITPR3,KRT6B,LATS2,MYC,NOS3,NR4A3,PDGFA,PHC2,PIM1,PIM3,POLR2A,POR,PPARD,PTTG1,RARA,RBL1,RHEB,SH3GL1,SHISA2,SLC11A2,SLC12A2,SLC20A1,SLC39A14,SMAD3,SOCS7,SOX7,TCF4,TEK,TET1,TGIF1,THRB,TIA1,TRIB1,VHL,XIRP1,ZC3H12A,ZFP36L1	57
Organismal Survival	organismal death	6.81e-06	Decreased	-4.078	ABCA5,ACTB,ACTN4,ACVR1,ACVR2A,ADAM15,ADAM22,ADAMTS1,ADAMTS9,ADH1C,ADM,ADRB2,AGO2,AGPAT2,ANGPT1,ANGPTL4,APEX1,ATF3,ATP2C1,B3GNT5,BBS4,BCAR1,BCL2L1,CDKN1A,CEBPB,CERK,CPT1A,CRK,CSF3,CSRNP1,CX3CR1,CYR61,DACH1,DDX58,DGKD,DLL1,DLL4,DNAJB1,DOK7,DUSP1,E2F3,EGR3,EIF2AK3,EIF4A1,ENG,ERRFI1,ESR1,ETS2,EYA1,FAM20C,FANCM,FAT4,FBXL20,FBXO4,FBXW7,FGFR1,FLCN,FLRT2,FLRT3,FOS,FOSL2,FOXO1,GAB1,GADD45A,GDNF,GNAL,GPX3,…	195
